# Supplementary material for: Kinetics of initiating polypeptide elongation in an IRES-dependent system
Source: eLife journal article supplement (doi:10.7554/elife.13429), 2016-06-02
Supplement: figures [file elife-13429-figures-v2.pdf]

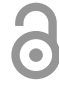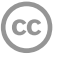

---

## Figures and figure supplements

Kinetics of initiating polypeptide elongation in an IRES-dependent system

**Haibo Zhang et al**

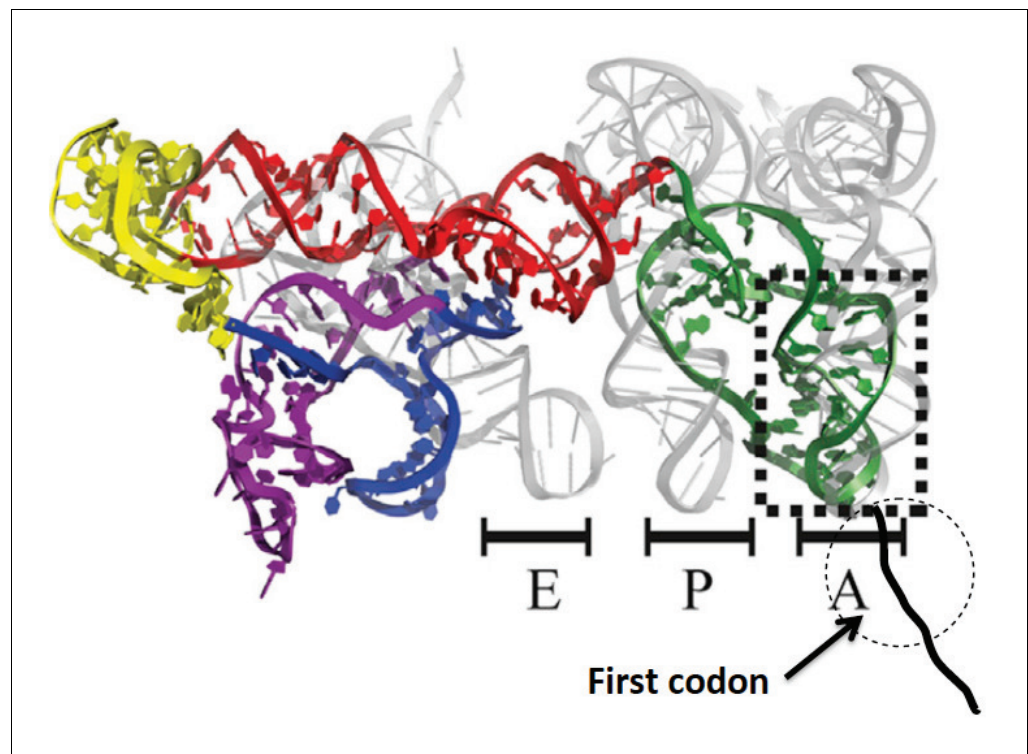

**Figure 1.** Structure of CrPV-IRES bound to the 80S ribosome superposed on A, P, and E tRNA binding sites. The position of the first codon is indicated. Adapted from *Fernandez et al. (2014)*.

DOI: [10.7554/eLife.13429.003](https://doi.org/10.7554/eLife.13429.003)

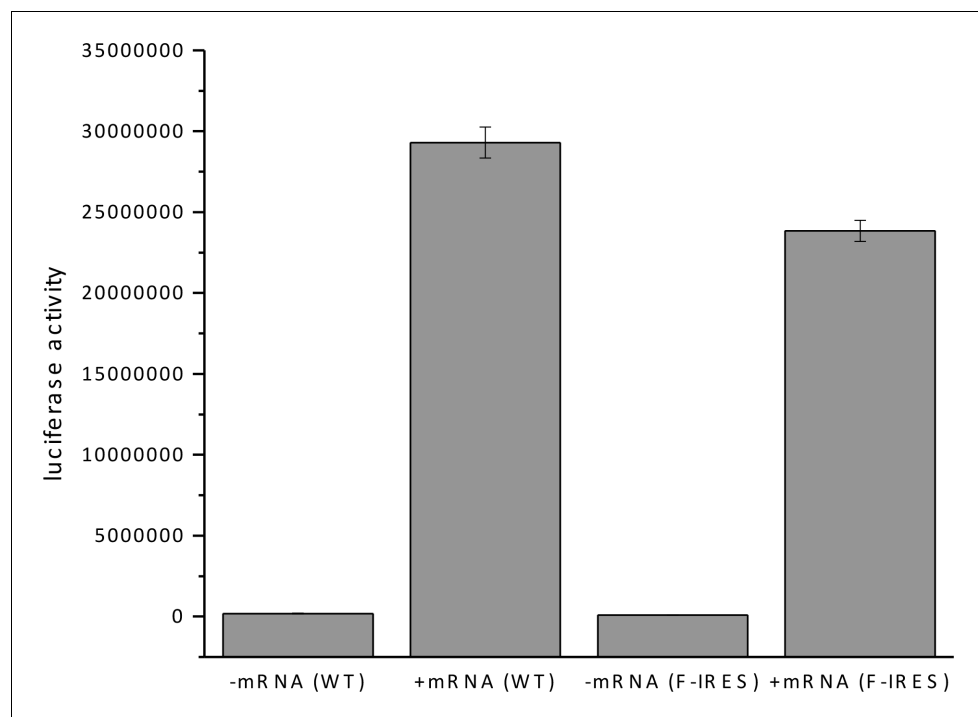

**Figure 1—figure supplement 1.** In vitro translation of firefly luciferase with WT and mutated F-IRES mRNA.  
DOI: [10.7554/eLife.13429.004](https://doi.org/10.7554/eLife.13429.004)

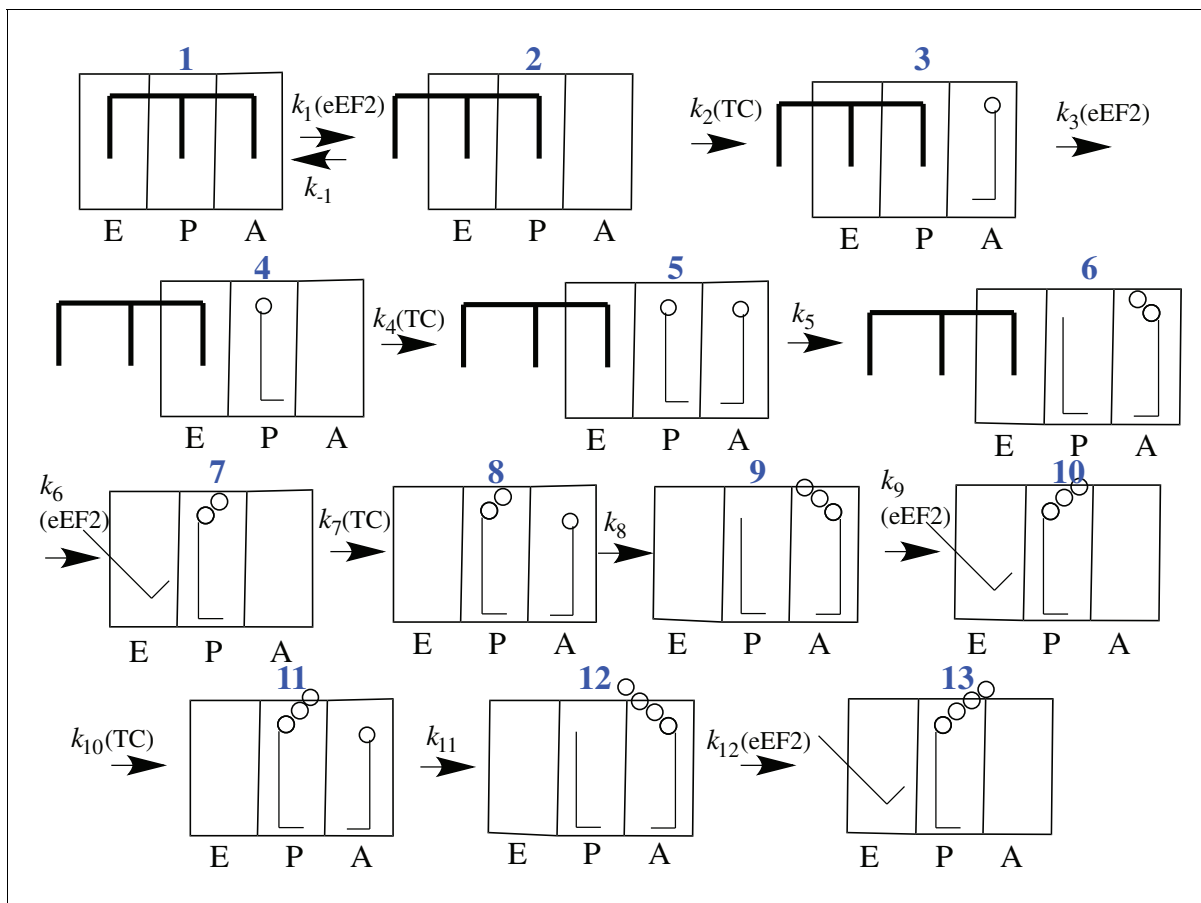

**Figure 2.** Proposed scheme for initial tetrapeptide synthesis on CrPV IRES-programmed ribosomes. This simplified scheme neglects the several substeps, including GTP hydrolysis,  $P_i$  release, and elongation factor release, that accompany both productive binding of ternary complex to the ribosome (Steps 2, 4, 7, 10) and tRNA translocation (Steps 3, 6, 9, 12).

DOI: [10.7554/eLife.13429.005](https://doi.org/10.7554/eLife.13429.005)

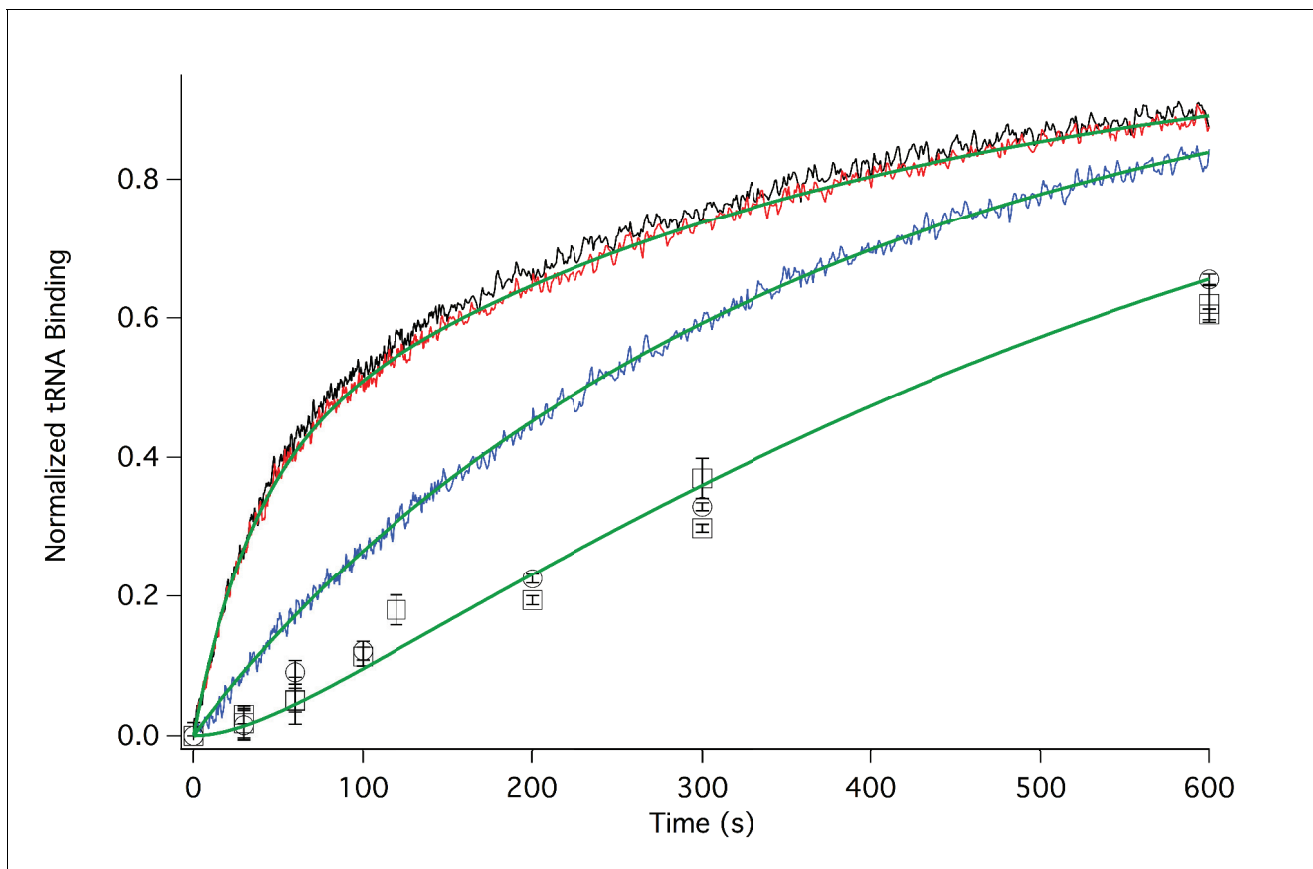

**Figure 3.** Rates of initial Phe-tRNA<sup>Phe</sup> binding measured by fluorescence anisotropy or Phe-tRNA<sup>Phe</sup> cosedimentation. Fluorescence anisotropy changes were monitored after rapid mixing of Phe-tRNA<sup>Phe</sup> (Prf) ternary complex (0.1  $\mu$ M final concentration, containing 1 mM GTP) with 80S-FVKM-IRES complex (0.1  $\mu$ M final concentration) either in the absence of eEF2 (blue line) or with 80S-FVKM-IRES complex that was pre-incubated with either 3  $\mu$ M (black line) or 1  $\mu$ M eEF2-GTP (red line) for 1–2 hr. These long times ensured full equilibration prior to TC addition. In the latter cases, eEF2 concentration was kept constant by including 3  $\mu$ M or 1  $\mu$ M eEF2, respectively, in the TC solution. eEF2 displays virtually no GTPase activity when it is not bound to the ribosome (Nygård and Nilsson, 1989). Rates of Phe-tRNA<sup>Phe</sup> binding to the P site, as determined by cosedimentation, were measured by rapidly mixing Phe-TC (1.6  $\mu$ M final concentration) with 80S-FVKM-IRES complex (0.8  $\mu$ M final concentration) pre-incubated for 5' – 60' in the presence (1  $\mu$ M) ( $\square$ ) or absence of eEF2-GTP (O). In both cases, eEF2 final concentration after mixing was adjusted to 1  $\mu$ M, by including 1  $\mu$ M or 2  $\mu$ M eEF2-GTP, respectively, in the TC solution. After quenching with 0.5 M MES buffer (pH 6.0), ribosome bound Phe-tRNA<sup>Phe</sup> was measured by cosedimentation. In the preincubation experiment, three-fold increases of both eEF2-GTP and Phe-TC concentrations, or of just eEF2-GTP concentration, had little effect on the cosedimentation results. Results in this Figure are corrected for IRES-independent changes in fluorescence anisotropy or Phe-tRNA<sup>Phe</sup> cosedimentation (Figure 3—figure supplements 1,2). All three solid green lines are best fits of the results obtained to the scheme in Figure 2, using the numerical integration program Scientist.

DOI: 10.7554/eLife.13429.006

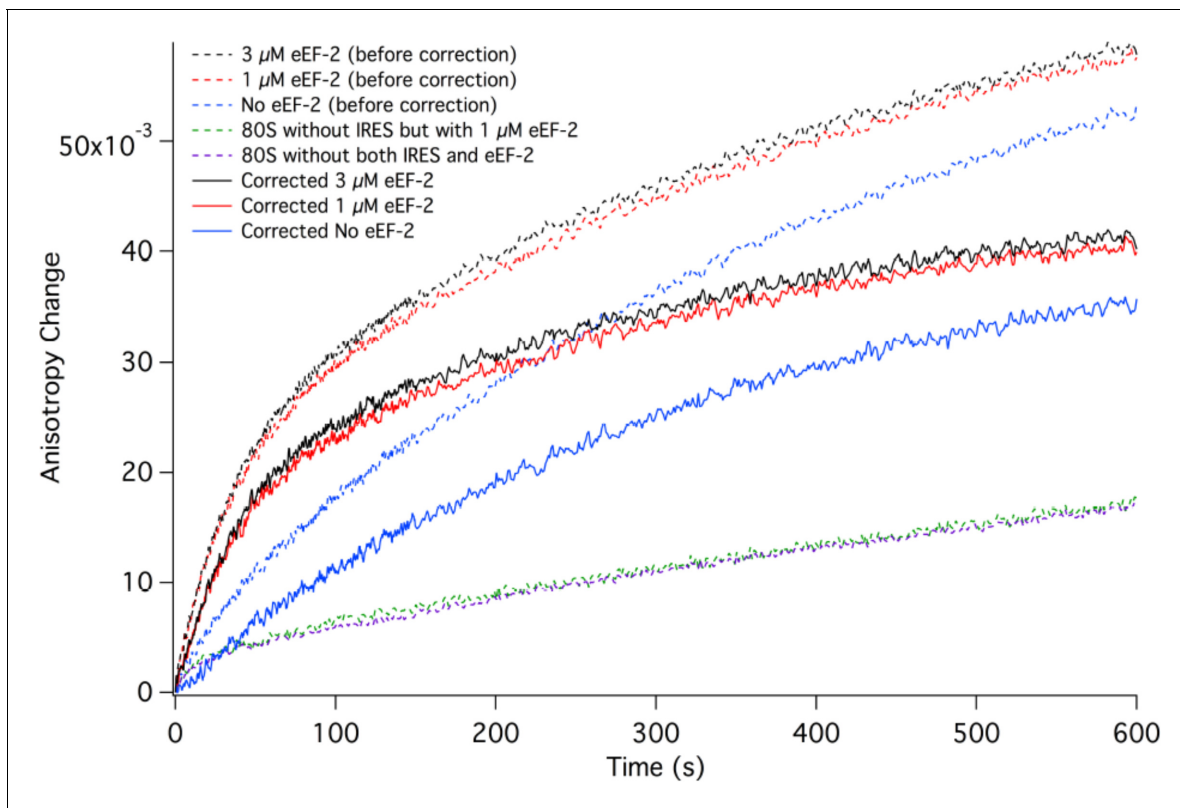

**Figure 3—figure supplement 1.** Corrected IRES-dependent time courses for initial Phe-tRNA<sup>Phe</sup> binding as measured by fluorescence anisotropy. Experiments were carried out as described in **Figure 3**, but in the presence or absence of added IRES. Fluorescence anisotropy changes were monitored after rapid mixing of Phe-tRNA<sup>Phe</sup>(Prf) ternary complex (0.1  $\mu$ M final concentration) with either 80S-FVKM-IRES complex (0.1  $\mu$ M final concentration) or just 80S (0.1  $\mu$ M final concentration). These experiments were carried out either in the absence of eEF2 (80S-FVKM-IRES complex, dotted blue line; 80S, dotted purple line) or with 0.5–2.5 hr preincubation with eEF2 [80S-FVKM-IRES complex, dotted red line, 1  $\mu$ M eEF2; dotted black line, 3  $\mu$ M eEF2; 80S, 1  $\mu$ M eEF2, dotted green line]. In the latter cases, eEF2 concentration was kept constant by including 1 or 3  $\mu$ M eEF2 in the TC solution. Subtraction of the results obtained with 80S alone from the results obtained with 80S-FVKM-IRES complex yields the corrected time courses for IRES-dependent fluorescence anisotropy change with eEF2 preincubation (solid red (1  $\mu$ M) and black (3  $\mu$ M) lines) or in the absence of eEF2 (solid blue line). These solid lines are presented in **Figure 3**.

DOI: [10.7554/eLife.13429.007](https://doi.org/10.7554/eLife.13429.007)

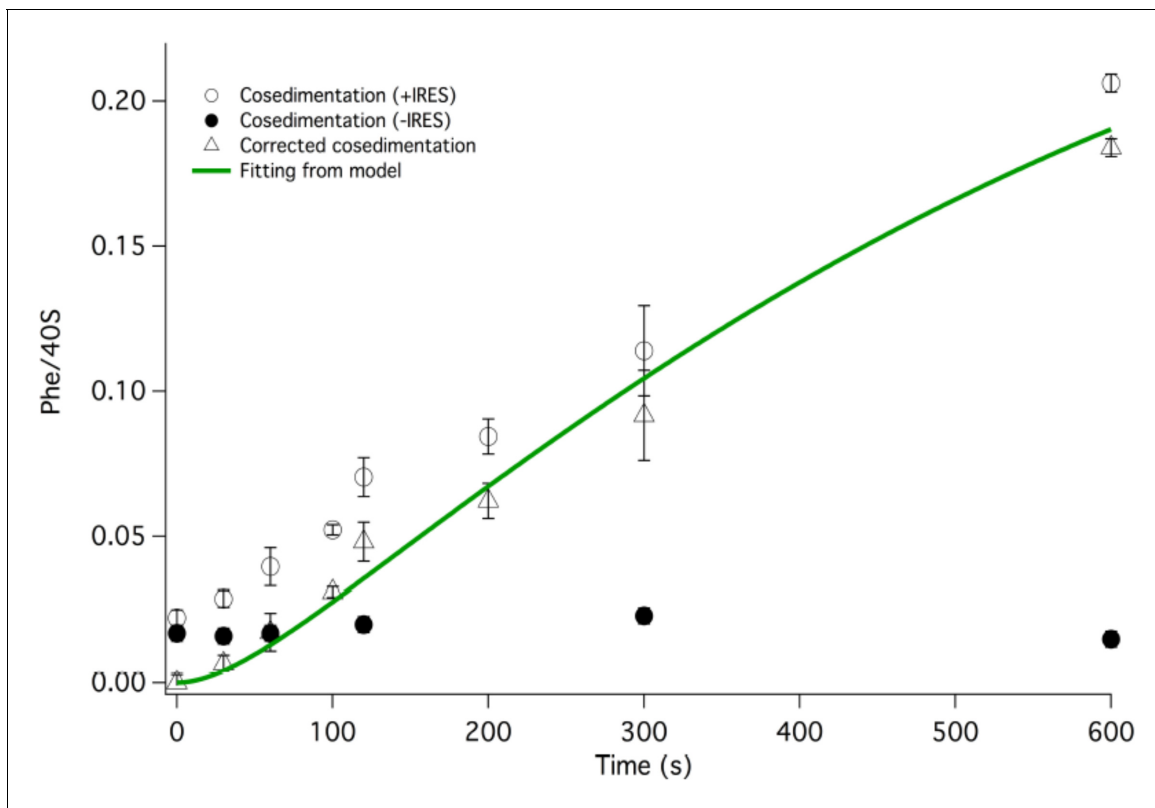

**Figure 3—figure supplement 2.** Corrected IRES-dependent time courses for initial Phe-tRNA<sup>Phe</sup> binding as measured by Phe-tRNA<sup>Phe</sup> cosedimentation. Phe-TC (1.6  $\mu$ M final concentration) was rapidly mixed with either 80S-FVKM-IRES complex (0.8  $\mu$ M final concentration) or just 80S (0.8  $\mu$ M final concentration). These experiments were carried out either in the absence of preincubation with eEF2 or with 5–60 min preincubation with 1  $\mu$ M eEF2. In both cases, eEF2 final concentration after mixing was adjusted to 1  $\mu$ M by adding the appropriate amounts to the TC solution. After quenching with 0.5 M MES buffer (pH 6.0), ribosome bound Phe-tRNA<sup>Phe</sup> was measured by cosedimentation. As preincubation with eEF2 gave no significant difference on either IRES-dependent or IRES-independent Phe-tRNA<sup>Phe</sup> cosedimentation, the results with and without eEF2 preincubation were averaged. Subtraction of the averaged results obtained with 80S alone (I) from the averaged results obtained with 80S-FVKM-IRES complex (O) yields the corrected time course for IRES-dependent Phe-tRNA<sup>Phe</sup> cosedimentation ( $\Delta$ ). The corrected results and solid line which is a best fit of the results obtained to the scheme in **Figure 2**, using the numerical integration program Scientist, are presented in **Figure 3**. The final corrected stoichiometry was 0.29 Phe/40S.

DOI: [10.7554/eLife.13429.008](https://doi.org/10.7554/eLife.13429.008)

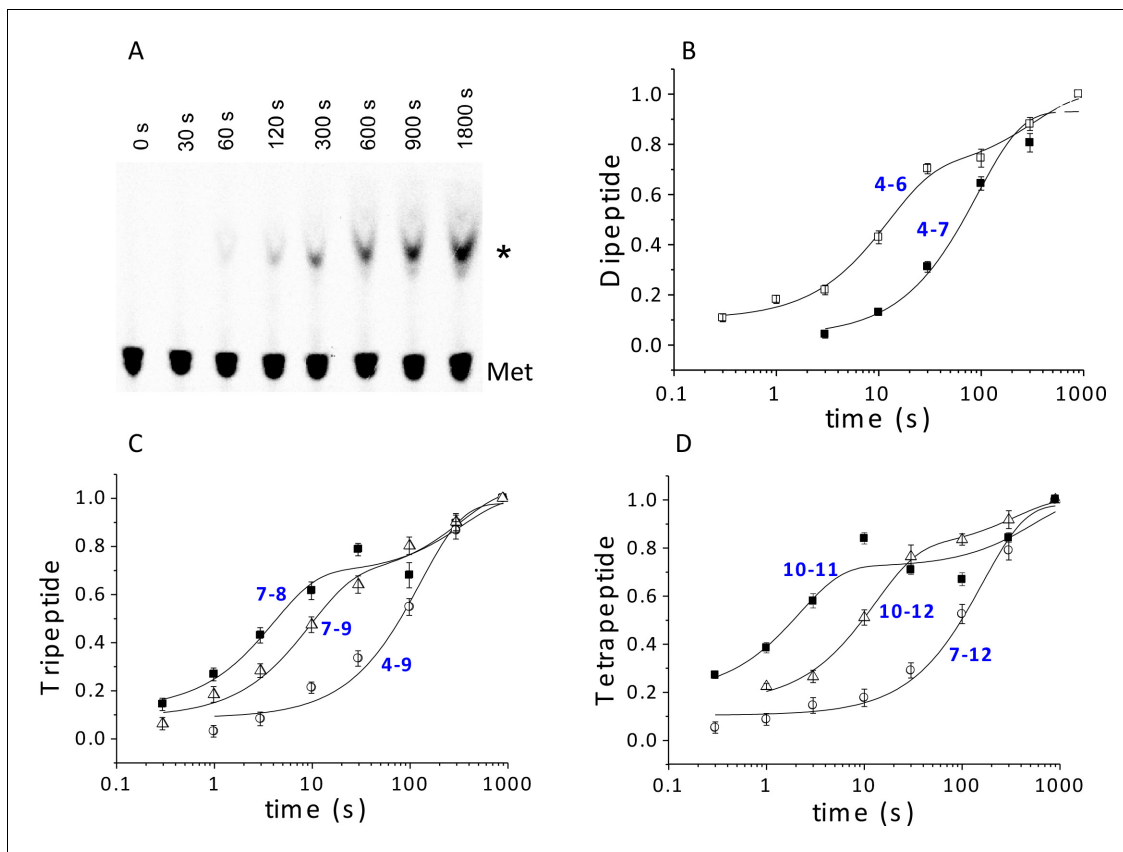

**Figure 4.** Kinetics of peptide synthesis and Met-tRNA<sup>Met</sup> cosedimenting with ribosomes. Reaction mixtures were quenched at various times after mixing. Peptide synthesis aliquots were quenched with 0.8 M KOH, and the released [<sup>35</sup>S]-containing peptide was resolved and quantified by TLE and autoradiography (Materials and methods). Cosedimentation assay aliquots were quenched with 0.5 M MES buffer (pH 6.0) and [<sup>35</sup>S] cosedimenting with ribosomes was determined. For all the reactions shown, final concentrations of reactants after mixing were: 80S-IRES complexes (0.8 μM); all added TCs (1.6 μM); eEF2-GTP (1 μM). The numbers in blue in parts (B–D) refer to the Structures in **Figure 2** whose rates of conversion are measured. For example, the peptide synthesis result in part (B) labeled 4 – 6 measures conversion of Structure 4 to Structure 6. (A) Time course for formation of PheValLysMet tetrapeptide as determined by TLE. 80S-FVKM-IRES complex was mixed with Phe-TC, Val-TC, Lys-TC and [<sup>35</sup>S]-Met-TC. The migration positions of [<sup>35</sup>S]-Met and [<sup>35</sup>S]-PheValLysMet (\*) are indicated. (B) 80S-FM-IRES complexes with Phe-tRNA<sup>Phe</sup> at the P site were mixed with [<sup>35</sup>S]-Met-TC. Dipeptide synthesis (□); cosedimentation assay (■). (C) Tripeptide synthesis: 80S-FKM-IRES complexes with either Phe-tRNA<sup>Phe</sup> (○) in the P site (Structure 4) or PheLys-tRNA<sup>Lys</sup> (Δ) in the P site (Structure 7) were mixed with either Lys-TC and [<sup>35</sup>S]-Met-TC or with just [<sup>35</sup>S]-Met-TC, respectively. Cosedimentation assay: 80S-FKM-IRES complex with PheLys-tRNA<sup>Lys</sup> in the P site was mixed with [<sup>35</sup>S]-Met-TC (■). (D) Tetrapeptide synthesis: 80S-FVKM-IRES complexes with either PheVal-tRNA<sup>Val</sup> (○) in the P site (Structure 7) or PheValLys-tRNA<sup>Lys</sup> (Δ) in the P site (Structure 10) were mixed with either Lys-TC and [<sup>35</sup>S]-Met-TC or with just [<sup>35</sup>S]-Met-TC, respectively. Cosedimentation assay: 80S-FKM-IRES complex with PheValLys-tRNA<sup>Lys</sup> in the P site was mixed with [<sup>35</sup>S]-Met-TC (■). Solid lines are best fits using single (B, 4–7; C, 4–9; D, 7–12) or double (B, 4–6; C, 7–8, 7–9; D, 10–11, 10–12) exponentials.

DOI: [10.7554/eLife.13429.010](https://doi.org/10.7554/eLife.13429.010)



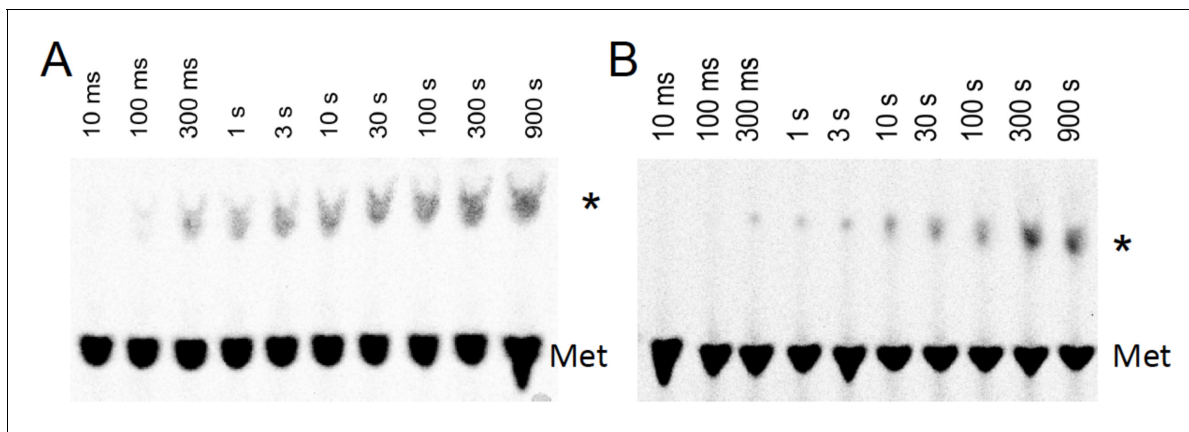

**Figure 4—figure supplement 1.** Time courses for formation of PheMet dipeptide and PheLysMet tripeptide as determined by TLE. (A) Dipeptide synthesis: 80S-FM-IRES complex with Phe-tRNA<sup>Phe</sup> in the P site was mixed with [<sup>35</sup>S]-Met-TC. (B) Tripeptide synthesis: 80S-FKM-IRES complex with Phe-Lys-tRNA<sup>Lys</sup> (Δ) in the P site was mixed with [<sup>35</sup>S]-Met-TC. The migration positions of [<sup>35</sup>S]-Met and [<sup>35</sup>S]-labeled peptides (\*) are indicated.

DOI: [10.7554/eLife.13429.011](https://doi.org/10.7554/eLife.13429.011)

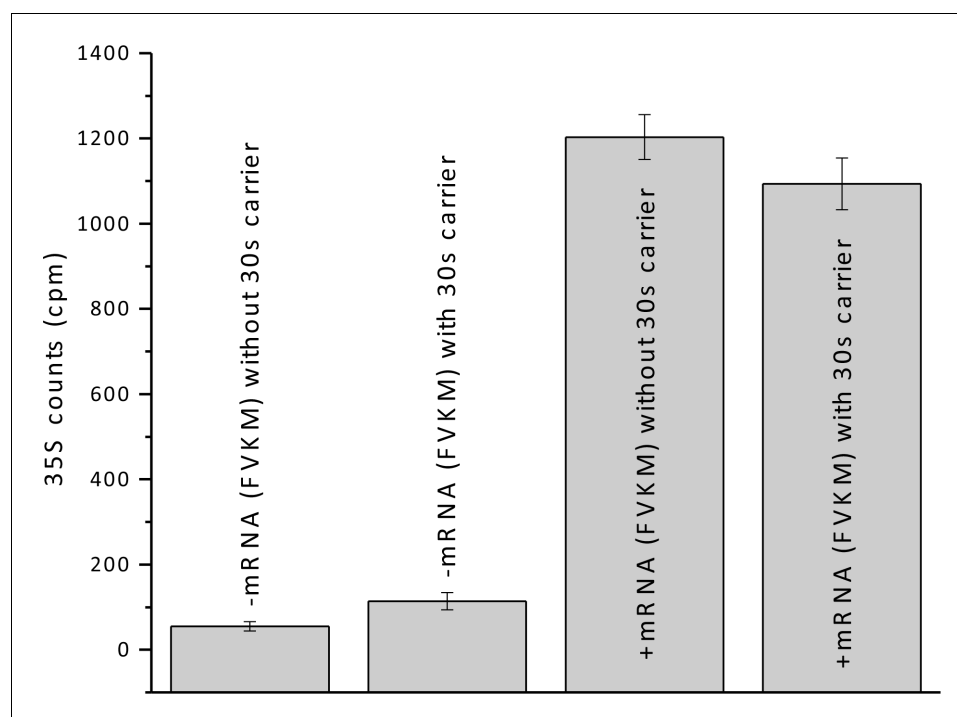

**Figure 4—figure supplement 2.** Added 30S carrier does not significantly change the amount of FVKM-tRNA<sup>Met</sup> co-sedimenting with 80S ribosomes in the presence and absence of FVKM-IRES.

DOI: [10.7554/eLife.13429.012](https://doi.org/10.7554/eLife.13429.012)

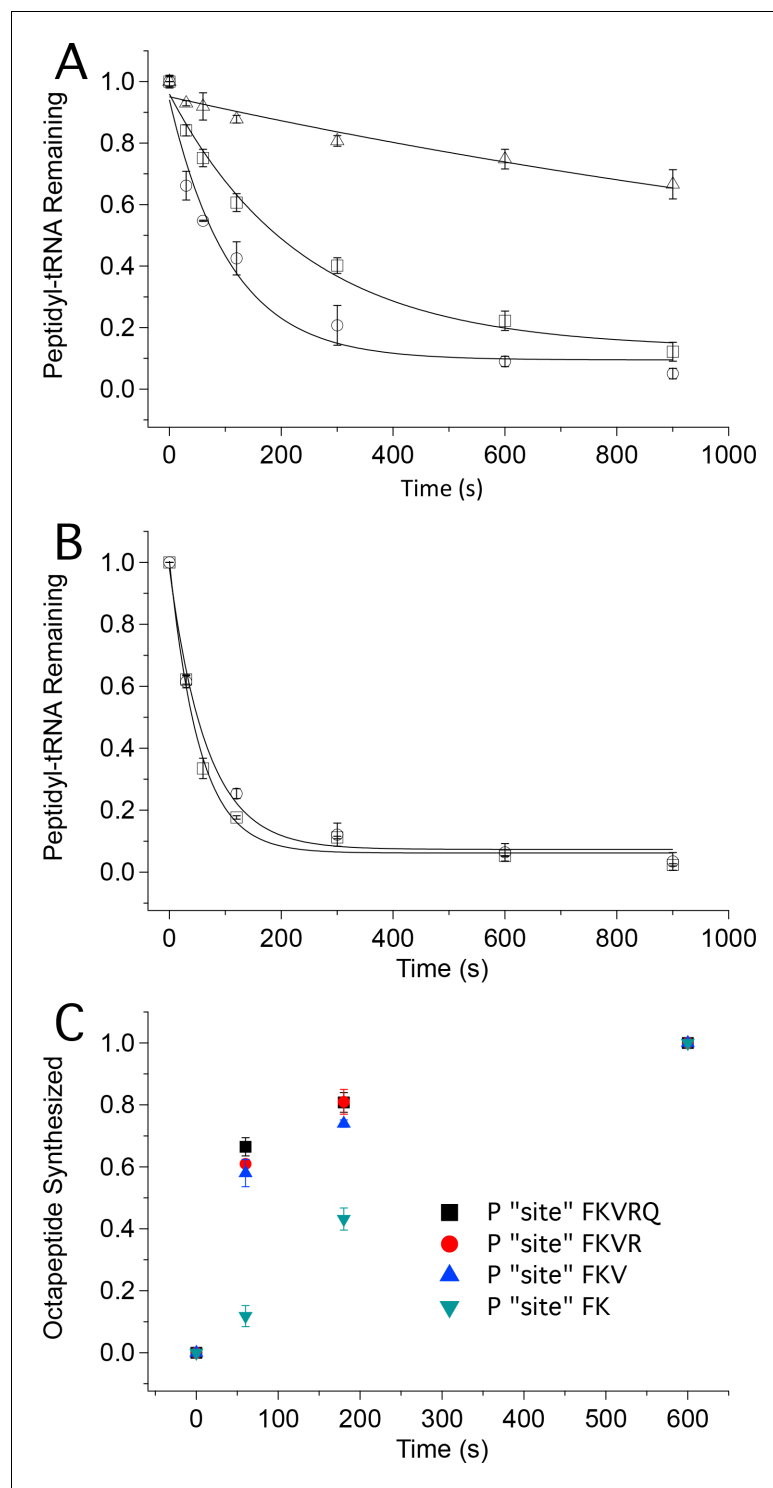

**Figure 5.** Tetrapeptide translocation (Step 12) is faster than tripeptide translocation (Step 9). (A) Puromycin reaction with PheValLys-tRNA<sup>Lys</sup> bound either at the A site (D) or at the P-site (O) of the 80S-FVKM-IRES complex or being translocated from the A site to the P site (□). (B) Puromycin reaction with PheValLysMet-tRNA<sup>Met</sup> either bound at the P-site (O) of the 80S-FVKM-IRES complex or being translocated from the A site to the P site (□). Lines in A. and B. Are fits to single exponentials. (C) Time dependence of PheLysValArgGlnTrpLeuMet octapeptide synthesis from the 80S-FKVRQWLM-IRES complex containing various peptidyl-tRNAs pre-bound at the P site, as indicated. The pre-bound peptidyl tRNAs were prepared using the standard procedure (see Complex Preparations in Materials and methods) by incubating the 80S-IRES complex with the relevant TCs for 15 min. The Figure 5 continued on next page

*Figure 5 continued*

remaining TCs needed for octapeptide synthesis, including [ $^{35}\text{S}$ ]-Met-TC, were then added, each at a concentration of 1.6  $\mu\text{M}$ , for the indicated times prior to quenching. PheLysValArgGlnTrpLeuMet octapeptide synthesis was measured by [ $^{35}\text{S}$ ]-Met cosedimenting with 80S ribosome.

DOI: [10.7554/eLife.13429.014](https://doi.org/10.7554/eLife.13429.014)

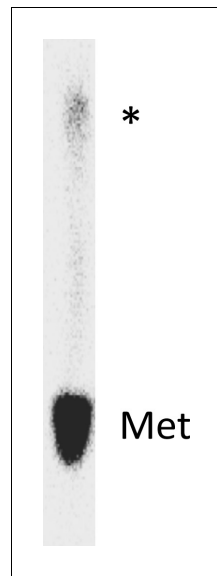

**Figure 5—figure supplement 1.** Octapeptide synthesis: 80S-FKVRQWLM-IRES complex with FKVRQWLM-tRNA<sup>Met</sup> in the P-site was prepared using the standard procedure (see Complex Preparations in Materials and methods) and incubating the 80S-IRES complex with the eight relevant TCs (including [<sup>35</sup>S]-Met-TC) for 40 min. The resulting labeled octapeptide, released by base hydrolysis, was analyzed by TLE. Migration positions of [<sup>35</sup>S]-Met and [<sup>35</sup>S]-labeled FKVRQWLM (\*) are indicated.

DOI: [10.7554/eLife.13429.015](https://doi.org/10.7554/eLife.13429.015)
