# Supplementary figures and images for: Kinetics of initiating polypeptide elongation in an IRES-dependent system
Source: eLife journal article supplement (doi:10.7554/elife.13429), 2016-06-02

Figure 4C-figure supplement1

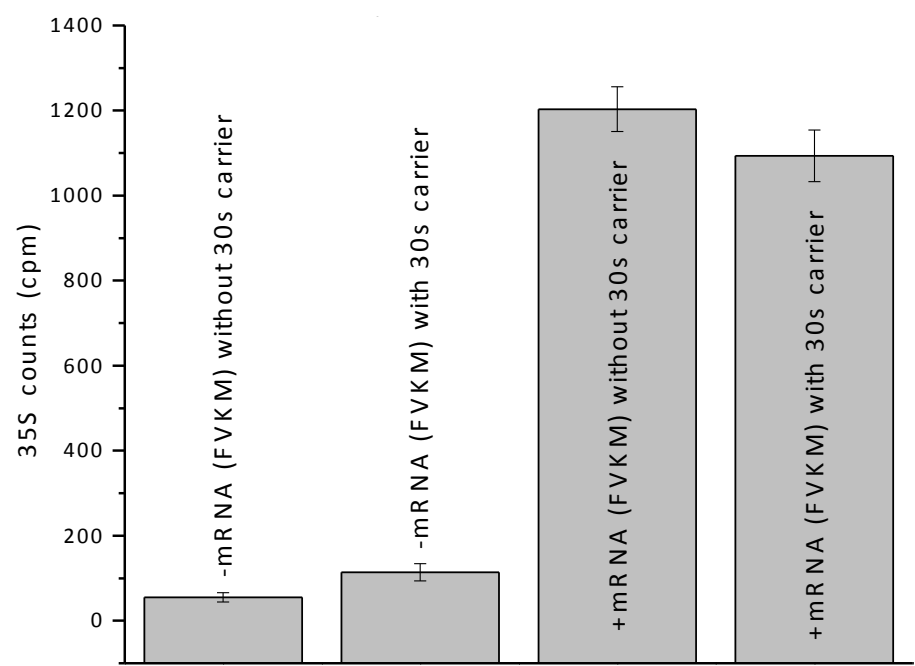

Supplement: supp [file elife-13429-supp-v1.zip]

Figure 5C-figure supplement1

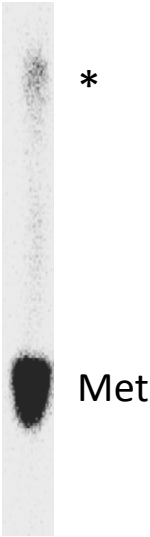

Supplement: supp [file elife-13429-supp-v1.zip]

Figure 4A-figure supplement1

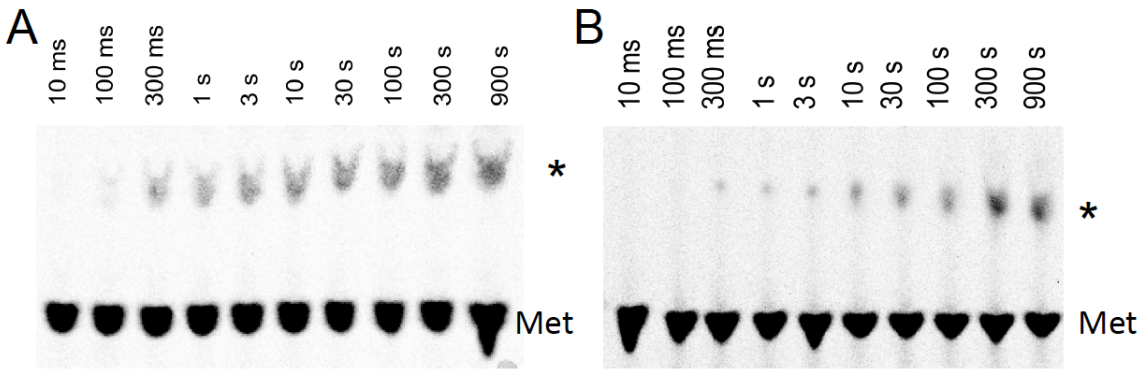

Supplement: supp [file elife-13429-supp-v1.zip]

Figure 1 - figure supplement 1

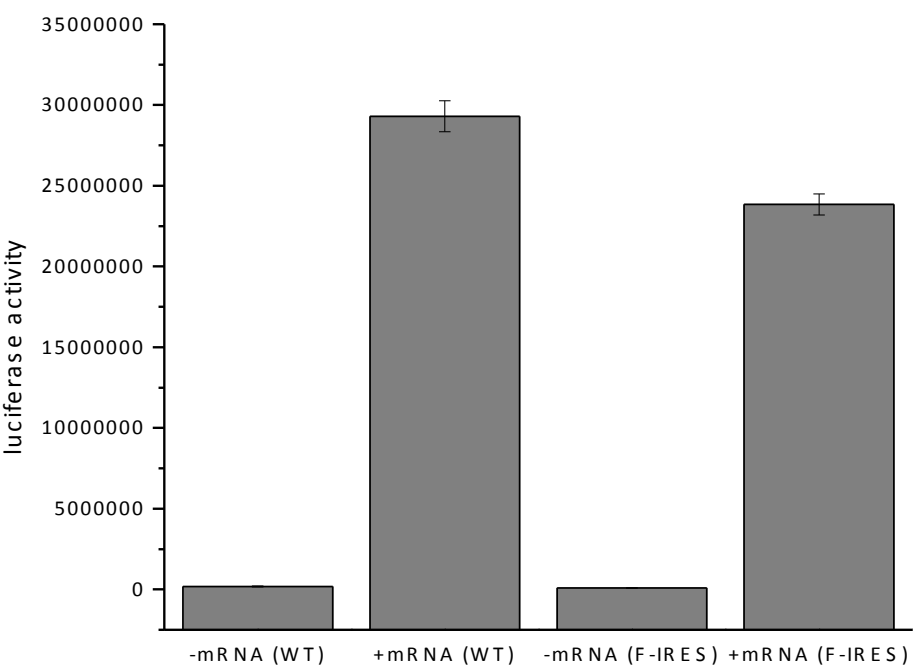

Supplement: supp [file elife-13429-supp-v1.zip]

Figure 3-figure supplement2

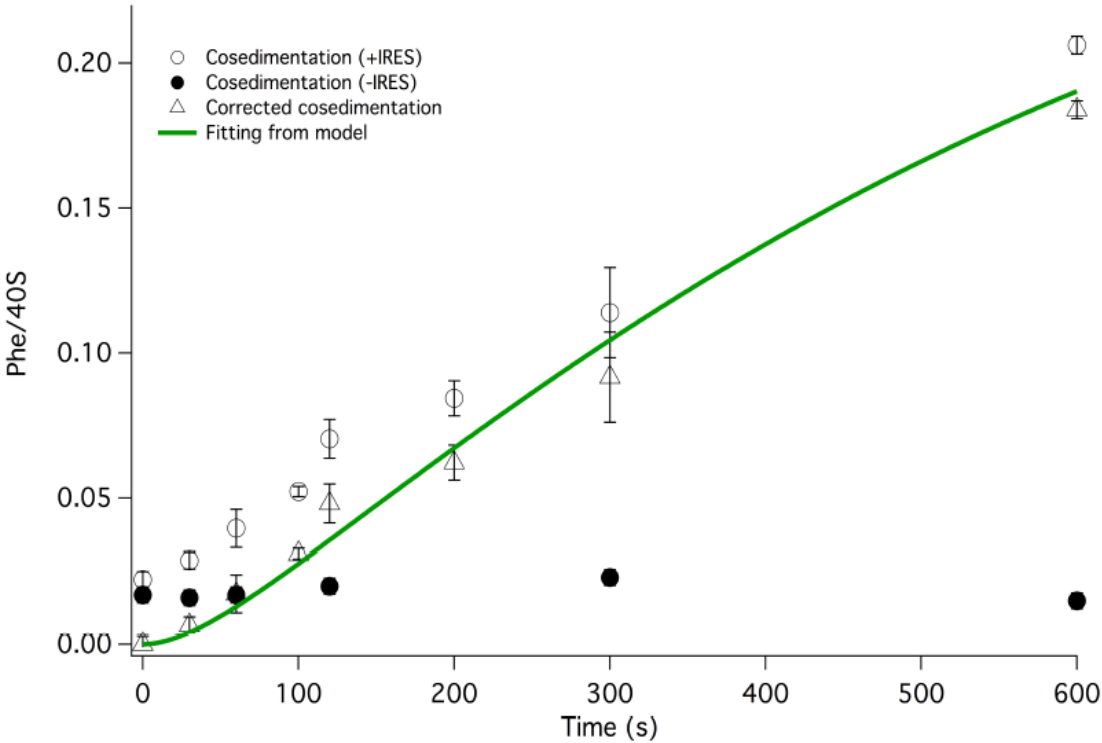

Supplement: supp [file elife-13429-supp-v1.zip]

Figure 3-figure supplement 1

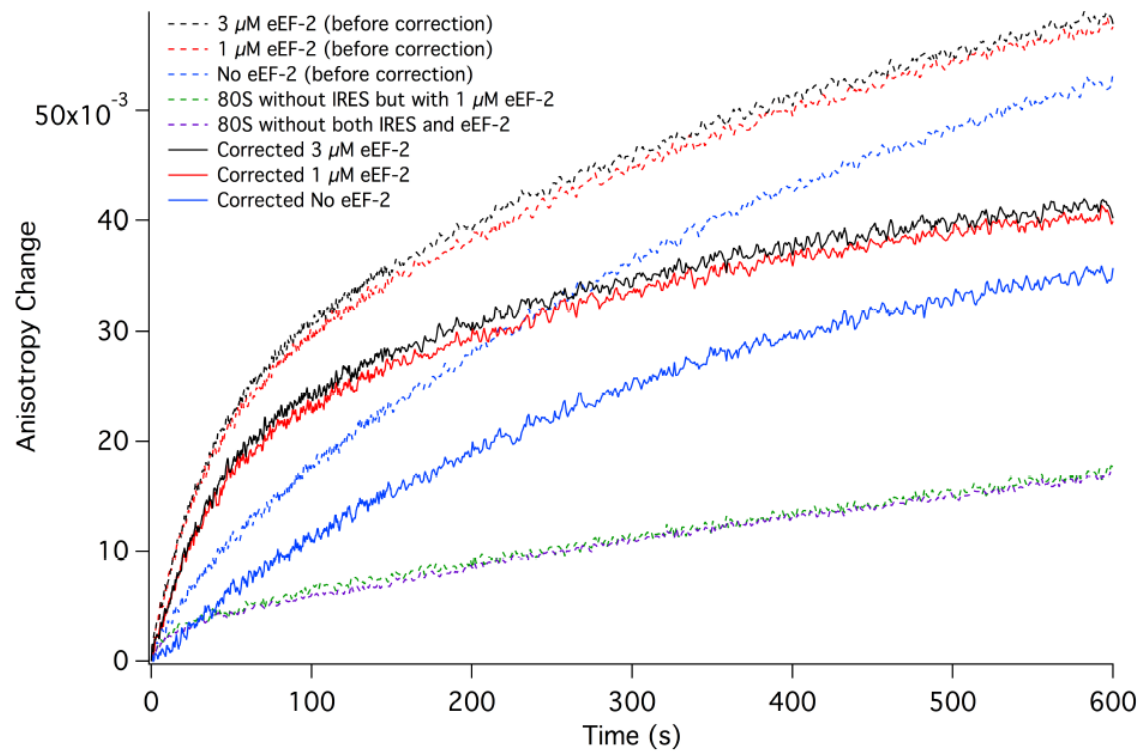

Supplement: supp [file elife-13429-supp-v1.zip]
